# Supplementary material for: A modular ditopic crown-shielded phosphate ion-pair receptor
Source: Royal Society of Chemistry journal article supplement (doi:10.1039/b409132a), 2004-01-01
Supplement: b409132a.doc [file b409132a.doc]

**Supporting Information**

**A Modular Ditopic Crown-Shielded Phosphate Ion-Pair Receptor**

Patrick Gunning, Andrew C. Benniston and Robert D. Peacock.

**Experimental.**

**General Procedures and Methods.** All chemicals were purchased from commercial sources and used without further purification. Solvents were dried by standard literature methods, distilled before use and stored over molecular sieves. All 1H and 13C NMR spectra were recorded on a Bruker 400 MHz spectrophotometer using the solvent as internal standard. Mass spectra were obtained using a Jeol “The Mstation” JMS 700 Mass Spectrometer using CI, EI, and FAB ionization techniques. Elemental analysis was carried out using in-house facilities.

**Potentiometric pH titrations**. Potentiometric titrations were carried out using a BDH-GELPLAS microelectrode fitted to a Corning pH Meter 240. A Gilson P1000 micropipette was used for precise addition of a 0.01 M NaOH standard solution. All standard solutions were prepared with de-ionised, distilled H2O. The experiments were carried out under an inert argon atmosphere at 25.0 °C (±0.1 °C) in a thermostated oil bath, and were performed three times to confirm validity. The program Excel was used to fit the graph and calculate the pKa of the bound water.

**Isothermal titration calorimetry ITC**. Isothermal titration calorimetry (ITC) experiments were used to measure the binding of **Zn(H2O)L** to various substrates, and were performed at 25 oC (298 K) using Microcal MCS and VP-ITC titration microcalorimeters. In order to minimize mixing heat effects caused by differences in solution composition, the substrates and **Zn(H2O)L**were both dissolved in freshly prepared HEPES buffer (pH = 7.4) before each titration experiment. All solutions prior to experiments were degassed before being added to the calorimeter cell. The substrates, at a concentration of approximately 5.0 mM, were injected in 10µL increments into the reaction cell (cell volume 1.31–1.41 mL) contaning **Zn(H2O)L** at a concentration of *ca* 0.25 mM, until there occurred a saturation of the macrocyclic cavity. A 250 µL injection syringe with 310–400 rpm stirring was used to give a series of 10 µL injections at 3-minute intervals. Control experiments for heats of mixing and dilution were performed under identical conditions and used for data correction in subsequent analysis. Data acquisition and subsequent non-linear regression analysis were done in terms of a simple binding model using the Microcal ORIGIN software package.

**ITC results for Zn(H2O)L bindingNa[H2PO4]**

**ITC results for Zn(H2O)cyclen binding Na[H2PO4]**

**ITC results for Zn(H2O)L binding K[H2PO4]**

**ITC results for Zn(H2O)cyclen binding K[H2PO4]**


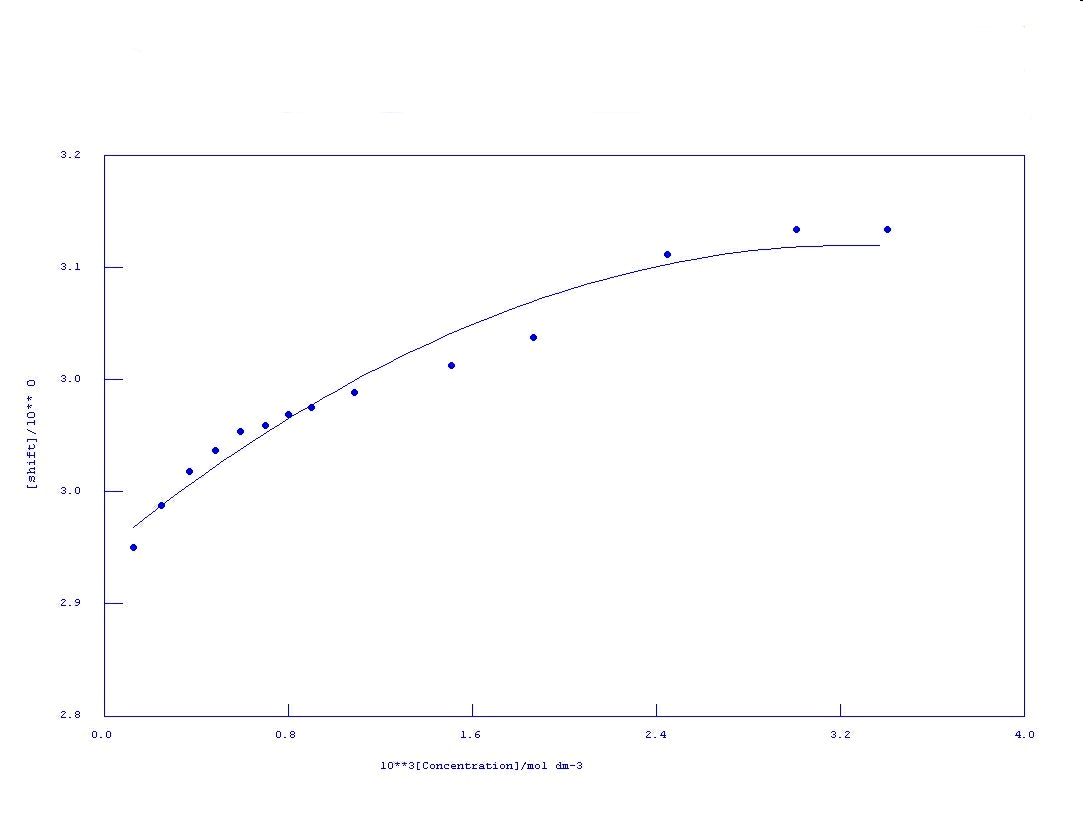
**1H NMR Titration Experiments.** Solutions of host ligand (0.0028 mmol) and sodium dihydrogen phosphate guest (0.056 mmol) were prepared in D2O. Ligand solution (0.5 ml) was added to an NMR tube and the 1H NMR spectrum (256 scans) taken, before a series of aliquots of phosphate solution were added via a Gilson P200 micropipette. The 1H spectrum was recorded after each injection. In a typical experiment 13 aliquots were added (8 x 10µL), (1 x 20µL), (2 x 50µL), (2 x µ100L), corresponding to 0.1, 0.2, 0.3, 0.4, 0.5, 0.6, 0.7, 0.8, 1.0, 1.5, 2.0, 3, 4, equivalents. Titration experiments were repeated in D6MSO, MeOD and CD3CN and the phosphate source was changed to tetrabutylammonium dihydrogen phosphate to allow phosphate solubility in the organic solvents. It was consequently shown through a series of titrations in the different solvents that no binding occurs in non-aqueous solution.

Fig 1. A typical EQNMR fitting for a 1H NMR titration of Zn(H2O)L with NaH2PO4, affording a 2:1 ratio of ligand to phosphate. The shift of a proton in the cyclic amine was followed to obtain the binding curve.

**UV/Visible Titration Experiments.** Solutions of host ligand (0.20 mmol) and sodium dihydrogen phosphate guest (2.0 mmol) were prepared in HEPES buffer (10 mmol) at pH 7.4. After the acquisition of a blank reading, a cuvette was filled with 2 ml of ligand solution (0.2 mmol) and the absorption measured. To the ligand cell were added a series of aliquots of guest solution and the absorbance recorded after each addition. In a typical experiment 14 aliquots were added (10 x 20 µL), (2 x 50 µL), (2 x 100 µL), corresponding to, 0.1, 0.2, 0.3, 0.4, 0.5, 0.6, 0.7, 0.8, 0.9, 1.0, 1.5, 2, 3, 4 equivalents.

## It was not possible to obtain binding constants due to the insignificant shifts which occurred in the UV/Vis spectrum.

## Molecular Modelling

## Molecular modelling calculations were carried out in the Molecular Photonics Laboratory using commercially available software. The computer drawn structure was energy minimised using CAChe and the semi-empirical AM1 model in MOPAC2000. Calculations were carried out *in vacuo* using a number of starting geometries and the global minimum structure identified (Fig. 2).

**
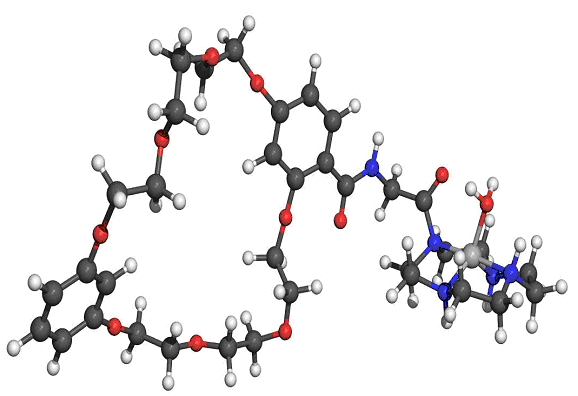
**

Fig 2. Ball and stick representation of the energy minimised structure of the receptor ligand L.

Synthesis of L

L

**2,5,8,11,17,20,23,26-Octaoxatricyclo [25.3.1.112,16] dotriaconta 1(30), 12(32), 13,15, 27(31), 28-hexaene-13-carbaldehyde (3).**

1H NMR (CDCl3) 3.67 (m, 8H, CH2), 3.72-3.83 (m, 8H, CH2), 3.99 (t, 2H, *J* = 5.7 Hz, CH2), 3.99 (t, 2H, *J* = 5.9 Hz, CH2), 4.09 (m, 4H, CH2), 6.38-6.47 (m, 5H, Ar-H), 7.05 (t, 1H, *J* = 7.3 Hz, Ar-H), 7.68 (d, 1H, *J* = 8.6 Hz, Ar-H), 10.34 (s, 1H, CHO); 13C NMR (CDCl3)  67.6 (CH2), 67.8 (CH2), 68 (CH2), 68.5 (CH2), 69.7 (CH2), 69.8 (CH2), 70.0 (CH2), 70.1 (CH2), 71.0 (CH2), 71.2 (CH2), 71.4 (CH2), 71.6 (CH2), 100.0 (CH), 102.4 (CH), 106.9 (CH), 107.0 (CH), 107.7 (CH), 119.6 (C), 130.1 (CH), 130.5 (CH), 160.3 (C), 160.36 (C), 163.4 (C), 165.7 (C), 188.7 (CHO). IR (KBr) 2867, 1671 (C=O), 1594 and 1490, (Ar), 840, 815 (*meta*-disubstituted Ar) cm-1; HRMS (EI), calcd. for C25H32O9 [M+], *m/z* =476.2046, fnd. 476.2046. Elemental analysis calcd. for C25H32O9: C, 63.01; H, 6.76%, fnd. C, 62.60; H, 6.78%.

**2,5,8,11,17,20,23,26-Octaoxatricyclo [25.3.1.112,16] dotriaconta 1(30), 12(32), 13,15, 27(31), 28-hexaene-13-carboxylic acid (4).**

1H NMR (CDCl3)  3.63 (m, 8H, CH2), 3.67 (m, 2H, CH2), 3.72 (t, 2H, *J* = 4.0 Hz, CH2), 3.77 (t, 2H, *J* = 4.0 Hz, CH2),3.83 (t, 2H, *J* = 4.0 Hz, CH2), 3.88 (t, 2H, *J* = 4.0 Hz, CH2), 4.08 (t, 2H, *J* = 4.0 Hz, CH2), 4.12 (t, 2H, *J* = 4.0 Hz, CH2), 4.27 (t, 2H, *J* = 4.0 Hz, CH2), 6.29 (t, 1H, *J* = 2.4 Hz, Ar-H), 6.36 (dd, 2H, *J* = 8.0 and 0.4 Hz, Ar-H), 6.45 (d, 1H, *J* = 2.4 Hz, Ar-H), 6.55 (dd, 1H, *J* = 10.4 and 2.0 Hz, Ar-H), 6.99 (t, 1H, *J* = 8.0 Hz, Ar-H), 7.92 (d, 1H, *J* = 8.0 Hz, Ar-H); 13C NMR (CDCl3)  67.3 (CH2), 67.7 (CH2), 68.2 (CH2), 69.1 (CH2), 69.6 (CH2), 69.8 (CH2), 70.0 (CH2), 70.1 (CH2), 70.7 (CH2), 71.2 (CH2), 71.4 (CH2), 71.8 (CH2), 101.0 (CH), 102.3 (CH), 106.4 (CH), 107.6 (CH), 108.0 (CH), 111.5 (C), 130.2 (CH), 135.5 (CH), 159.1 (C), 160.2 (C), 160.3 (C), 164.5 (C), 165.8 (C); IR (KBr) 3272, 2869, 2360, 1720 (C=O), 1604, 1490,1438, 1361, 1284, 1255, 1182, 1120, 1056, 987, 943, 836, 763, 682, 634 cm-1; HRMS (EI) calcd. for C25H32O10 [M+], *m/z* = 492.1995, fnd. 492.1997.

**2,5,8,11,18,21,24,27-Octaoxa-tricyclo[26.3.1.012,17]dotriaconta-1(31),12(17), 13,15, 28(32),29 - hexaene-29-carboxylic acid [2-oxo-2-(1,4,7,10tetraaza-cyclododec-1-yl)-ethyl]-amide (L).**

1H NMR (CDCl3)  2.55-2.90 (m, 12H, CH2), 3.47 (m, 2H, CH2), 3.54 (m, 2H, CH2), 3.61-3.69 (m, 8H, CH2), 3.72 (t, 2H, *J* = 4.8 Hz, CH2), 3.78 (t, 4H, *J* = 5.2 Hz, CH2), 3.95 (t, 2H, *J* = 5.2 Hz, CH2), 3.99-4.03 (m, 4H, CH2), 4.07 (t, 2H, *J* = 4.4 Hz, CH2), 4.13 (t, 2H, *J* = 5.2 Hz,CH2), 4.30 (d, 2H, *J* = 4.0 Hz, CH2), 6.39 (m, 5H, Ar-H), 7.05 (t, 1H, *J* = 8.0 Hz, Ar-H), 8.02 (d, 1H, *J* = 8.4Hz,Ar-H), 8.78 (s, 1H, NH); 13C NMR (CDCl3) 43.1 (CH2), 45.3 (CH2), 46.8 (CH2), 47.8 (CH2), 48.5 (CH2), 48.6 (CH2), 49.0 (CH2), 49.8 (CH2), 67.5 (CH2), 67.8 (CH2), 67.87 (CH2), 68.9 (CH2), 69.4 (CH2), 69.8 (CH2), 69.9 (CH2), 70.1 (CH2), 70.9 (CH2), 71.1 (CH2), 71.3(CH2), 71.4 (CH2), 100.6 (CH), 102.3 (CH), 106.3 (CH), 107.0 (CH), 107.7 (CH), 114.8 (C), 130.1 (CH), 133.9 (CH), 158.9 (C), 160.3 (2xC), 162.9 (C), 165.2 (C), 170.6(C); IR (KBr) 3361, 2867, 1631 (C=O tertiary amide), 1600 (C=O) secondary amide), 1521, 1452, 1353, 1257, 1184, 1106, 1056, 941, 800, 767; HRMS (FAB), calcd. for C35H54N5O10 [MH+] *m/z =* 704.3871, fnd. 704.3866.

**[Zn(L)OH2](CF3SO3)2**

1H NMR (MeOD4)  2.76-3.25 (m, 16H, CH2), 3.60-3.71 (m, 12H, CH2), 3.75 (t, 2H, *J* = 4.6 Hz, CH2), 3.86 (t, 2H, *J* = 4.9 Hz, CH2), 3.94 (t, 4H, *J* = 4.4 Hz, CH2), 4.10 (t, 2H, *J* = 4.3 Hz, CH2), 4.16 (t, 2H, *J* = 4.5 Hz, CH2), 4.31 (s, 2H, CH2 (Gly)), 6.31-6.41 (m, 3H, Ar-H), 6.52-6.61 (m,2H, Ar-H), 6.98 (t, 1H, *J* = 8.0 Hz, Ar-H), 7.86 (d, 1H, *J* = 8.8 Hz, Ar-H); 13C NMR (MeOD4) 45.1 (CH2), 45.3 (CH2), 45.5 (CH2), 46.8 (2xCH2), 47.8 (3xCH2), 68.8 (CH2), 69.0(CH2), 69.4 (CH2), 70.4 (CH2), 70.6 (CH2), 70.9 (CH2), 71.2 (CH2), 71.8 (CH2), 72.1 (CH2), 72.2 (2xCH2), 72.3(CH2), 102.1 (CH), 103.6 (CH), 108.0 (CH), 108.4 (CH), 108.5 (CH), 117.5 (C), 120.5 (C), 123.7 (C), 127.1 (C), 131.3 (CH), 134.7 (CH), 161.0 (C), 161.83 (C), 161.85 (C); IR (KBr) 3397, 2009, 1957, 1598 (C=O amide), 1452, 1222, 1166, 1025, 831, 761; HRMS (FAB), calcd. for [Zn**L**(CF3SO3)]+ *m/z =*  916.2557, fnd. 916.2492.
